# Supplementary material for: New insights into the enzymatic role of EF-G in ribosome recycling
Source: PubMed Central journal article supplement — Nucleic Acids Res. 2015 Oct 1;43(21):10525–33. doi: 10.1093/nar/gkv995 (PMC4666400; doi:10.1093/nar/gkv995), 2015-10-01
Supplement: supp_gkv995_nar-01293-r-2015-File008.pdf [file supp_gkv995_nar-01293-r-2015-File008.pdf]

1 **Supplementary Data**

2 **Supplementary Figures 1-6**

|                      | EF-G wt         | QSGGRGQ   |                                                         | HDVDSSE            |
|----------------------|-----------------|-----------|---------------------------------------------------------|--------------------|
| <b>Loop Deletion</b> | $\Delta$ loop I | K-----Y   | $\Delta$ loop II(584-586)<br>$\Delta$ loop II'(586-589) | H---SSE<br>HDV---- |
| <b>Single-Site</b>   | <b>K506A</b>    | AQSGGRGQY | <b>H583K</b>                                            | KDVDSSE            |
|                      | <b>K506E</b>    | EQSGGRGQY | <b>D584A</b>                                            | HAVDSSE            |
|                      | <b>Q507A</b>    | KASGGRGQY | <b>V585A</b>                                            | HDADSSE            |
|                      | <b>Q507N</b>    | KNSGGRGQY | <b>V585N</b>                                            | HDNDSSE            |
|                      | <b>Q507E</b>    | KESGGRGQY | <b>D586A</b>                                            | HDVASSE            |
|                      | <b>Q507L</b>    | KLSGGRGQY | <b>D586K</b>                                            | HDVKSSE            |
|                      | <b>S508A</b>    | KQAGGRGQY | <b>S587A</b>                                            | HDVDASE            |
|                      | <b>G509D</b>    | KQSDGRGQY | <b>S588A</b>                                            | HDVDSAE            |
|                      | <b>G509F</b>    | KQSFGRGQY | <b>S588P</b>                                            | HDVDSPE            |
|                      | <b>G510D</b>    | KQSGDRGQY | <b>E589A</b>                                            | HDVDSSA            |
|                      | <b>G510F</b>    | KQSGFRGQY |                                                         |                    |
|                      | <b>R511A</b>    | KQSGFAGQY |                                                         |                    |
|                      | <b>G512D</b>    | KQSGGRDQY |                                                         |                    |
|                      | <b>G512F</b>    | KQSGGRFQY |                                                         |                    |
|                      | <b>Q513A</b>    | KQSGGRGAY |                                                         |                    |
|                      | <b>Y514D</b>    | KQSGGRGQD |                                                         |                    |
| <b>Y514L</b>         | KQSGGRGQL       |           |                                                         |                    |

3

4 **Supplementary Figure 1.** Constructs of EF-G mutants in this study. The loop I and  
 5 loop II of EF-G domain IV are indicated in magenta and blue, respectively. The  
 6 exchanged sites are indicated in red.

7

**A** Single site mutants in loop I

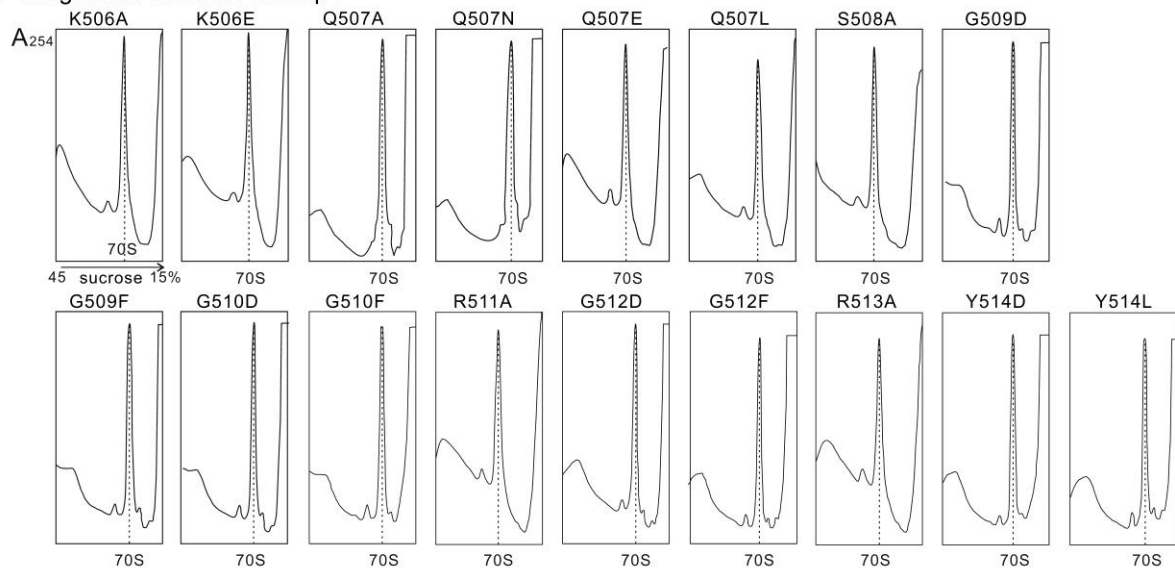

**B** Single site mutants in loop II

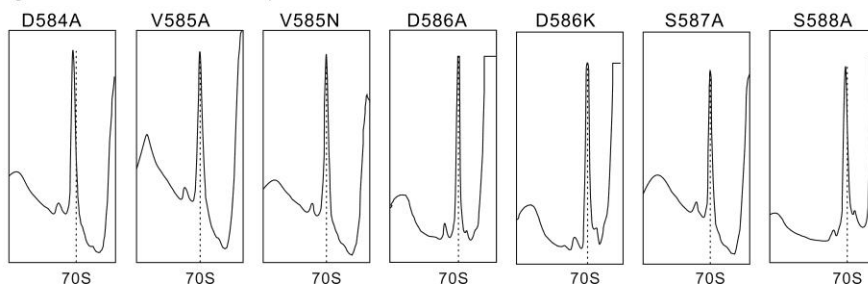

1

2 **Supplementary Figure 2.** The effect of EF-G single site mutants on polysome  
3 breakdown. The polysomes were incubated with RRF and EF-G mutants with single  
4 site mutation in loop I (**A**) or loops II (**B**) of domain IV. The 70S position is indicated  
5 with dashed line.

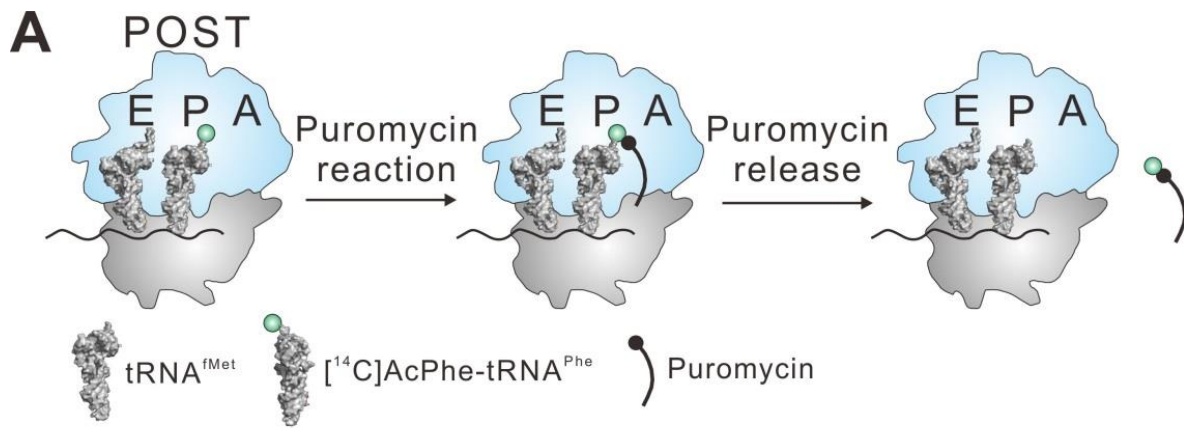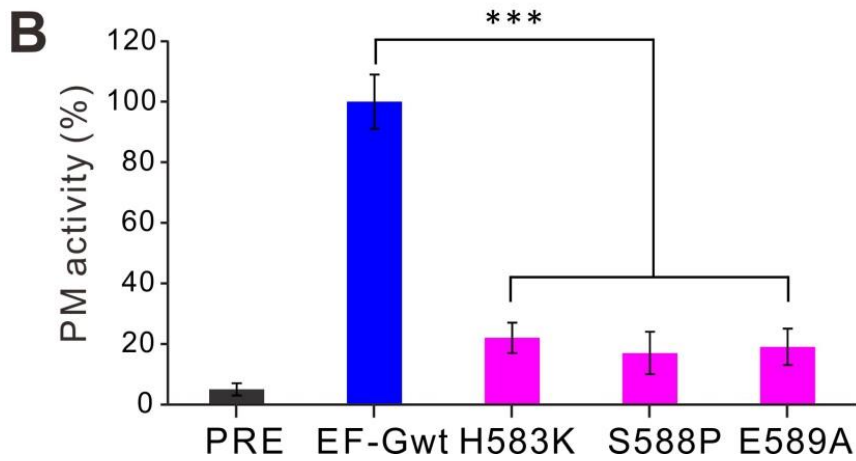

1

2 **Supplementary Figure 3.** The effect of EF-Gwt or mutants on puromycin (PM)  
 3 activities. **(A)** Brief mechanism of PM reaction. **(B)** Effect of single site mutation on  
 4 PM reactivity. Error bars, s.e.m. (n = 5 technical replicates). \*\*\* $P < 0.001$ .

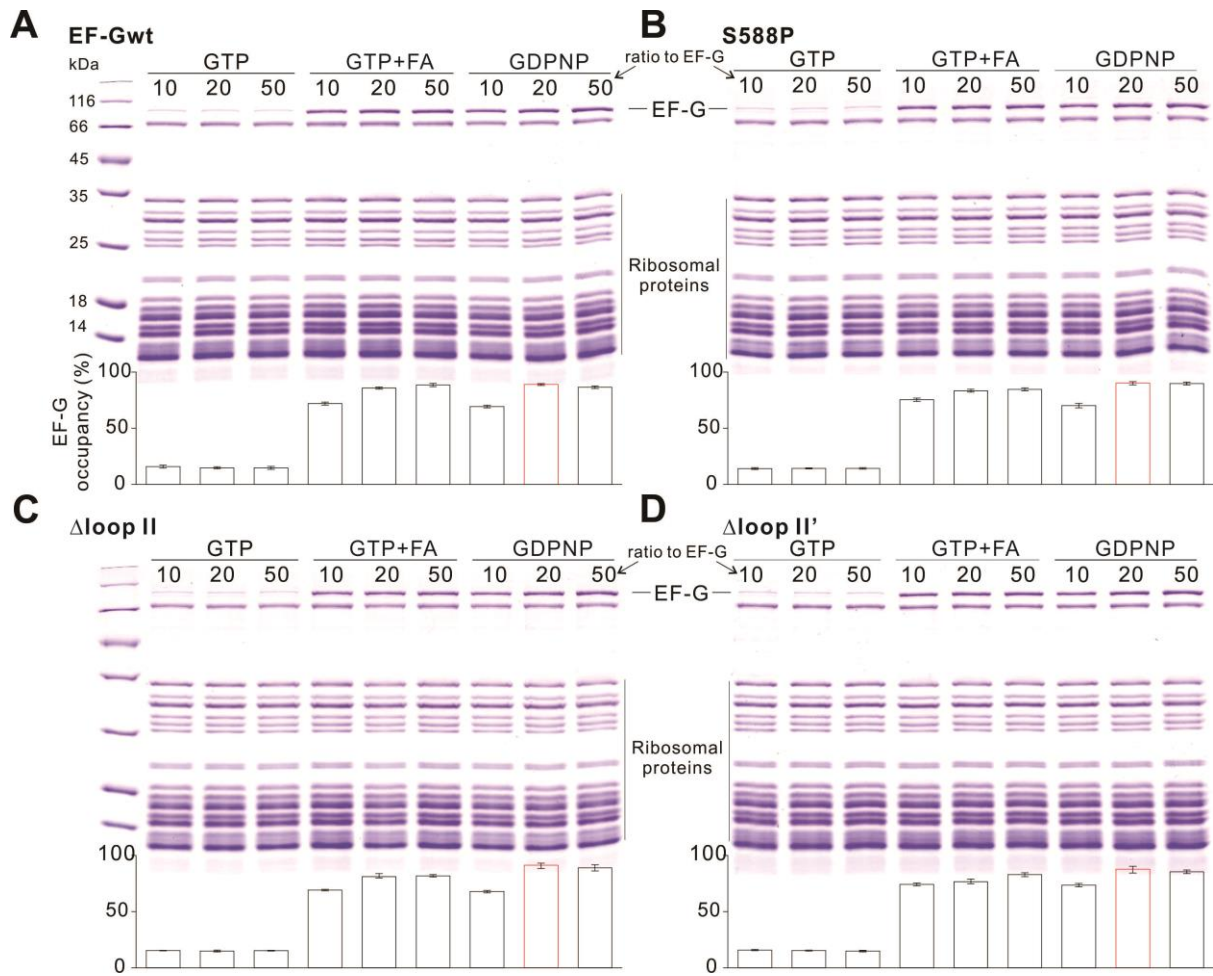

1

2 **Supplementary Figure 4.** Condition optimization to achieve PoTC•EF-G•RRF  
 3 complex. Titration of nucleotides to EF-Gwt (**A**) or mutants (**B-D**). Quantification of  
 4 EF-G occupancy on PoTC is shown beneath each gel. The optimized ratio is colored  
 5 in red. Error bars, s.e.m. (n = 3 technical replicates).

6

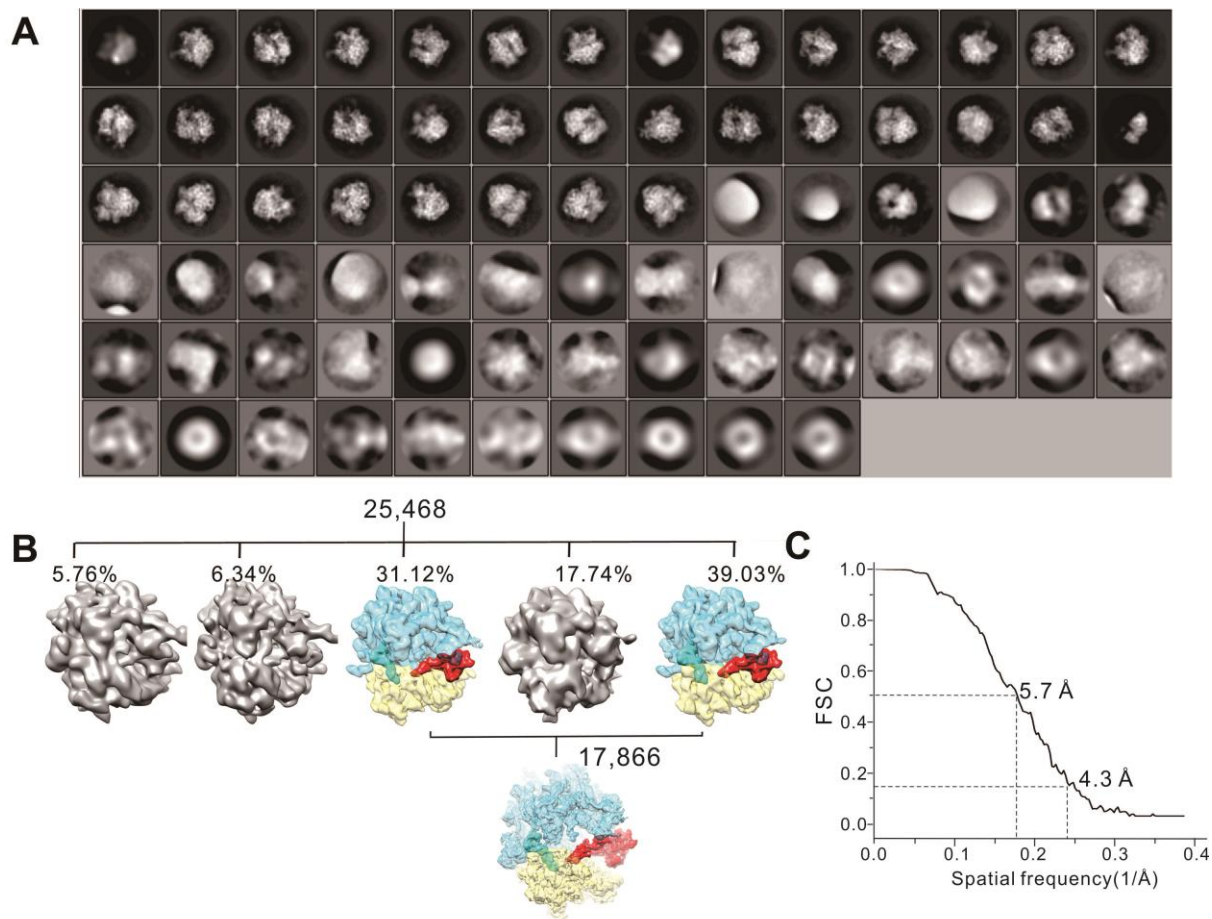

1

2 **Supplementary Figure 5.** (A) 2D class averages of cryo-EM particles. (B)  
 3 Schematic diagram of 3D classification of PoTC•S588P•GDPNP. The detailed  
 4 protocol has been described in Supplementary Methods, section of “Image  
 5 processing”. (C) Fourier Shell Correlation (FSC) curves of the PoTC complexes  
 6 containing EF-G S588P mutant.

7

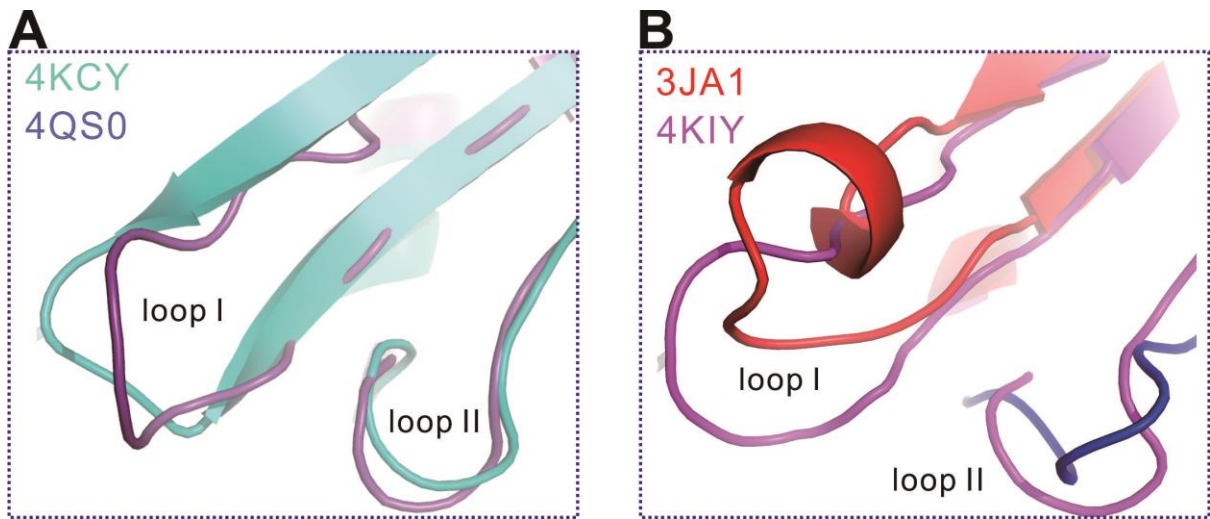

1  
 2 **Supplementary Figure 6.** Comparison of the conformations of loop I and loop II from  
 3 the crystal structures of *T. thermophiles* 70S•EF-G (PDB 4KCY (1) and 4QS0 (2)) (**A**),  
 4 and the cryo-EM structure of *E. coli* 70S•EF-G (PDB 3JA1 (3)) and crystal structure of  
 5 *E. coli* 70S•EF-G (PDB 4KIY (4)) (**B**). Alignments were done using domain IV of EF-G  
 6 as reference.

# 1 **Supplementary Methods**

## 3 **EF-G and RRF construction and purification**

4 All EF-G proteins used in this study were prepared according to our previous study  
5 (5). Based on the RRF gene sequence of *E. coli*, forward primer  
6 (ggaattc**catATG**ATTAGCGATATCAGAAAAGATGC) and reverse primer  
7 (ccg**ctcgag**TCAGAACTGCATCAGTTCTGCTTC) containing *NdeI* and *XhoI*  
8 restriction sites (bold underlined) respectively, were designed to amplify the *E. coli*  
9 RRF gene by PCR using genomic DNA from *E. coli* DH5 $\alpha$  as the template DNA. The  
10 PCR product was inserted into the *NdeI* and *XhoI* sites of pET-22b(+) after digestion  
11 with the same enzymes, resulting in pET22b-RRF for expression of RRF with no tag.  
12 The plasmid was transformed into *E. coli* BL21 (DE3), and then RRF expression was  
13 induced with 0.5 mM IPTG at 37°C. After sonification and centrifugation, the lysate  
14 was applied to SP column. The target protein was collected and concentrated, then  
15 further purified by gel filtration with Sephadex G-75 column.

## 16 **70S ribosomes, Ac-[<sup>14</sup>C]-Phe-tRNA<sup>Phe</sup> and mRNA preparation**

17 Reassociated 70S ribosomes were prepared according to previously described (6).  
18 Purified tRNA<sup>Met</sup> and tRNA<sup>Phe</sup> from *E. coli* MRE600 were purchased from Sigma.  
19 tRNA<sup>Phe</sup> was aminoacylated with purified PheRS and acetylated with acetic anhydride  
20 as reported (7). MF-mRNA (5'-GGGAA GAAAA **GGAGG UCACA UAUGU UCAAA**  
21 GAAAA GAAAA GAAAA GAAAA GAAAA UGGAC UCAGA GCUAC GGAAA UAUUC  
22 G-3', which contains a Shine-Dalgarno sequence (bold underlined) and codes for MF  
23 (bold italic) was transcribed by T7 RNA polymerase (Promega, USA) from a  
24 double-stranded DNA template.

## 25 **PoTC preparation**

26 PoTC were prepared as described (1) with modification. Instead of MF-mRNA, here is  
27 MF-stop-mRNA with the stop codon UAA (5'-GGGAA GAAAA AAAAA UCACA  
28 **UAUGU UC~~UAA~~** GAAAA GAAAA GAAAA GAAAA GAAAA UGGAC UCAGA GCUAC  
29 GGAAA UAUUC G-3', which contains a stop codon (bold underlined) and codes for

1 MF (bold italic)). Then N-Ac-Phe-tRNA<sup>Phe</sup> was incorporated, followed by a puromycin  
2 treatment.

### 3 **Puromycin assay**

4 Analysis of translocation activity of EF-G was carried out according to previous  
5 studies (8,9) with minor modifications. The Pre-translocational (PRE) state complex  
6 was formed in a reaction volume of 12.5  $\mu$ l containing 5 pmol 70S ribosomes, 20 pmol  
7 MF-mRNA, and 10 pmol tRNA<sub>f</sub><sup>Met</sup>. The reaction mix was incubated for 15 min at 37°C  
8 to occupy the P site. The reactions were further incubated (25  $\mu$ l in total) for 30 min at  
9 37°C with 10 pmol of Ac-[<sup>14</sup>C]Phe-tRNA<sup>Phe</sup> to occupy the A site. For the formation of  
10 Post-translocational (POST) state complex, PRE complexes were incubated with 1  
11 pmol EF-G in the presence of 0.1 mM GTP (35  $\mu$ l in total) for the indicated time at  
12 37°C. The puromycin reaction were performed to assess the amount of  
13 Ac-[<sup>14</sup>C]Phe-tRNA<sup>Phe</sup> in the P site.

### 14 ***In vivo* growth assay**

15 LB broth was used for bacterial growth. The media was supplemented with  
16 kanamycin. IPTG was added to induce protein overexpression. The plasmids of  
17 pET-28a, *E. coli* EF-Gwt and mutants were transformed to BL21 (DE3) strain. For  
18 growth rate measurements, overnight cultures were diluted by 500-fold into 100 ml of  
19 LB medium supplemented with chemicals as indicated. The flasks (250 ml) were  
20 shaken at 200 rpm at 37°C, and 1 ml samples were collected for optical density  
21 measurements. The translation efficiency *in vivo* was analyzed by <sup>35</sup>S-methionine  
22 incorporation assay. At indicated time points, samples were taken from each culture,  
23 and the incorporation of radioactive material was determined.

### 24 **Steady-state fluorescence measurements**

25 This assay was carried out according to previous study (10) with minor modifications.  
26 PRE complexes were formed by activating ribosomes (0.25  $\mu$ M) at 42°C for 10 min in  
27 the appropriate buffer (20 mM HEPES pH7.6, 6 mM MgAc<sub>2</sub>, 150 mM NH<sub>4</sub>Ac, 6 mM



1  $\beta$ -Mercaptoethanol, 2 mM spermidine and 0.1 mM spermine), followed by incubation  
2 at 37°C for 10 min. Pyrene-modified mRNA (0.38  $\mu$ M) was added to the ribosome and  
3 the complexes were incubated at 37°C for 6 min. Next, tRNA<sub>f</sub><sup>Met</sup> (0.3  $\mu$ M) was added  
4 and the complexes were incubated at 37°C for 30 min followed by addition of  
5 Ac-[<sup>14</sup>C]Phe-tRNA<sup>Phe</sup> (0.3  $\mu$ M) and incubation at 37°C for 30 min. Steady-state  
6 fluorescence emission spectrums of PRE and POST complexes were analyzed on a  
7 Varioskan Flash Multimode Reader instrument (Thermo Scientific, USA). The PRE  
8 and POST samples were excited at 343 nm wavelength and the emission spectrum  
9 from 365–499 nm wavelengths was recorded.

### 10 **Sucrose cushion assay**

11 The experiment was prepared as described (11) with modification. Fifty pmol of 70S  
12 ribosomes were incubated with RRF, EF-G or its mutants, and guanosines in binding  
13 buffer for 15 min at 37°C in a 200  $\mu$ l reaction mixture. Samples (120  $\mu$ l) were overlaid  
14 onto a 75  $\mu$ l sucrose cushion consisting of 1.1 M sucrose, and 25  $\mu$ M guanosine in  
15 binding buffer and centrifuged at 78,000 rpm for 30 min at 4°C. The supernatant was  
16 removed, and the pellets were dissolved in 20  $\mu$ l Tico buffer (20 mM HEPES-KOH pH  
17 7.5, 6 mM MgAc<sub>2</sub>, 30 mM NH<sub>4</sub>Ac and 4 mM 2-mercaptoethanol). Five pmol  
18 ribosomes were loaded onto a 10% SDS-PAGE gel and quantified by Image-J  
19 software (NIH).

### 20 **Polysomes fractionation and factor detection by western blotting**

21 Cell lysate was layered on top of density gradient sucrose (15%-45%, w/v) in RRF  
22 buffer and centrifuged for 3.5 hr at 36,000 rpm and 4°C in a SW40 rotor. The  
23 separated samples were fractionated at 0.5 ml/min by using a fraction system  
24 monitored by A<sub>254</sub> measurement. The binding of EF-G and RRF to the polysome were  
25 probed with antibodies against RRF, EF-G and S2 (Abcam, GB) and secondary  
26 mouse-anti-Rabbit antibody (Abcam). For detection, the ChemiScope 3500 Mini  
27 (CLiNX Science Instrments, CN) was used following the manufacturer's instructions.

### 28 **Fluorescent labeling and FRET measurements**

1 Mutant variants of ribosomal proteins S6 (E75C) and L9 (N11C) were created by  
2 site-directed mutagenesis, expressed, purified and labeled separately with maleimide  
3 derivatives of AF555 (donor) or AF647 (acceptor) (Lifetech, USA). Labeled proteins  
4 were used for *in vitro* reconstitution as described (12). Reconstituted 30S and 50S  
5 subunits were associated in a reaction buffer containing 20 mM HEPES pH7.6, 20  
6 mM MgAc<sub>2</sub>, 100 mM NH<sub>4</sub>Ac, 6 mM β-Mercaptoethanol and 2 mM spermidine for 10  
7 min at 37°C. Labeled 70S ribosomes were then isolated after centrifugation through a  
8 10%–30% (w/v) sucrose gradient. Ribosomal complexes were constructed and all  
9 FRET measurements taken in buffer containing 20 mM HEPES pH7.6, 6 mM MgAc<sub>2</sub>,  
10 150 mM NH<sub>4</sub>Ac, 6 mM β-Mercaptoethanol, 2 mM spermidine and 0.1 mM spermine.  
11 PoTC complexes were constructed by incubation of 70S ribosomes (0.5 μM) with  
12 MF-stop-mRNA (1 μM) and N-Ac-Phe-tRNA<sup>Phe</sup> (1 μM) for 20 min at 37°C. PoTC  
13 complex was treated with puromycin and diluted to a final concentration of 0.1 μM.  
14 Finally, the samples were incubated with EF-G (4 μM) and GDPNP (0.4 mM) for 10  
15 min at 37°C. Details of the fluorescence measurements and data analysis were  
16 performed as previously described (13,14). Briefly, fluorescence measurements were  
17 taken using F-4500 FL spectrophotometer (Hitachi) at 20°C. Two emission spectra  
18 were taken for each sample by exciting fluorescence at 550 nm (emission 560-800 nm)  
19 and 640 nm (emission 650-800 nm). The slit-widths for both excitation and emission  
20 were set to 5 nm spectral bandwidth. All experiments were done at least three times.

### 21 **Cryo-electron microscopy and data collection**

22 The ribosome sample with EF-G S588P was prepared as described (5) with  
23 modification. Briefly, 10 pmol of PoTC complex, 100 pmol of EF-G S588P and 5 μmol  
24 GDPNP were incubated together for 10 min at 37°C and diluted to a final  
25 concentration of ~60 nM. An aliquot of 3.5 μl of the diluted samples was applied to a  
26 Quantifoil R2/2 200 mesh holey grid (Quantifoil Micro Tools GmbH, Jena, Germany)  
27 and blotted for 4s in a chamber at 100% humidity using an FEI Vitrobot Mark IV.  
28 Images were taken using an FEI Titan Krios cryo electron microscope equipped with  
29 a Gatan K2 camera, operated at accelerating voltage of 300kV with magnification set  
30 to 22,000x. Defocus values in the final data set ranged from 1.5 to 3.5 μm. Data

1 acquisition was performed using UCSF-Image4 (written by X. Li and Y. Cheng,  
2 UCSF), with a nominal magnification of 22,500 x, which yields a final pixel size of 1.32  
3 Å at object scale, and with defocus ranging from -1.5 µm to -3.5 µm. A dose rate on  
4 the detector was about 8.2 counts per pixel per second with a total exposure time of 8  
5 seconds. Each micrograph stack contains 32 frames.

## 6 **Image processing**

7 Beam-induced motion correction at micrograph level was done according to a  
8 published protocol to produce average micrographs over all frames (15).  
9 Preprocessing of micrographs (461 in total) and particle picking were performed with  
10 standard SPIDER protocols (16). Particles-picking were done using a method based  
11 on a locally normalized cross-correlation function (17). Program of CTFFIND3 (18)  
12 was used to estimate the contrast transfer function parameters. The 2D, 3D  
13 classification and refinement were performed with RELION. An initial dataset of  
14 30,103 particles was imported into RELION (19) and subjected to reference free 2D  
15 classification (80 classes) (Supplementary Figure 5A). Good particles were combined  
16 (25,468 in total) and subjected to three dimensional (3D) classification  
17 (Supplementary Figure 5B). Particles were split into five groups. Two of them  
18 displayed well defined fine features on 3D structures, and therefore combined for  
19 structural refinement (17,866). A low-pass filtered (40 Å) empty 70S map was used as  
20 the reference during 3D classification. To minimize the reference bias, the 3D  
21 classification was done in four steps: (1) global and local search with an angular step  
22 of 7.5° for 25 iterations (5 iterations without angular restriction and 20 iterations with  
23 60° restriction) ; (2) local search (with 37° restriction) with an angular step of 3.7° for  
24 25 iterations; (3) local search (with 18° restriction) with an angular step of 1.8° for 25  
25 iterations; (4) local search (with 9° restriction) with an angular step of 0.9° for 25  
26 iterations. Structural refinement was done with a new set of dose-reduced particles  
27 only containing information from frames 3-14. Resolution estimations were done  
28 using the gold-standard FSC procedure, with a soft mask applied (Supplementary  
29 Figure 5C). Chimera (20) was used for structural analysis and figure preparation.

## 1 Supplementary References

- 2 1. Zhou, J., Lancaster, L., Donohue, J.P. and Noller, H.F. (2013) Crystal structures of EF-G-ribosome  
3 complexes trapped in intermediate states of translocation. *Science*, **340**, 1236086.
- 4 2. Zhou, J., Lancaster, L., Donohue, J.P. and Noller, H.F. (2014) How the ribosome hands the A-site tRNA  
5 to the P site during EF-G-catalyzed translocation. *Science*, **345**, 1188-1191.
- 6 3. Li, W., Liu, Z., Koripella, R.K., Langlois, R., Sanyal, S. and Frank, J. (2015) Activation of GTP hydrolysis in  
7 mRNA-tRNA translocation by elongation factor G. *Science advances*, **1**, e1500169.
- 8 4. Pulk, A. and Cate, J.H. (2013) Control of ribosomal subunit rotation by elongation factor G. *Science*,  
9 **340**, 1235970.
- 10 5. Liu, G., Song, G., Zhang, D., Zhang, D., Li, Z., Lyu, Z., Dong, J., Achenbach, J., Gong, W., Zhao, X.S. *et al.*  
11 (2014) EF-G catalyzes tRNA translocation by disrupting interactions between decoding center and  
12 codon-anticodon duplex. *Nat. Struct. Mol. Biol.* , **21**, 817-824.
- 13 6. Blaha, G., Stelzl, U., Spahn, C.M., Agrawal, R.K., Frank, J. and Nierhaus, K.H. (2000) Preparation of  
14 functional ribosomal complexes and effect of buffer conditions on tRNA positions observed by  
15 cryoelectron microscopy. *Methods Enzymol.* , **317**, 292-309.
- 16 7. Walker, S.E., Shoji, S., Pan, D., Cooperman, B.S. and Fredrick, K. (2008) Role of hybrid tRNA-binding  
17 states in ribosomal translocation. *Proc Natl Acad Sci U S A*, **105**, 9192-9197.
- 18 8. Dinos, G., Kalpaxis, D.L., Wilson, D.N. and Nierhaus, K.H. (2005) Deacylated tRNA is released from the  
19 E site upon A site occupation but before GTP is hydrolyzed by EF-Tu. *Nucleic Acids Res*, **33**, 5291-5296.
- 20 9. Watanabe, S. (1972) Interaction of siomycin with the acceptor site of Escherichia coli ribosomes. *J Mol*  
21 *Biol*, **67**, 443-457.
- 22 10. Studer, S.M., Feinberg, J.S. and Joseph, S. (2003) Rapid kinetic analysis of EF-G-dependent mRNA  
23 translocation in the ribosome. *J. Mol. Biol.* , **327**, 369-381.
- 24 11. Connell, S.R., Trieber, C.A., Dinos, G.P., Einfeldt, E., Taylor, D.E. and Nierhaus, K.H. (2003) Mechanism of  
25 Tet(O)-mediated tetracycline resistance. *EMBO J.* , **22**, 945-953.
- 26 12. Majumdar, Z.K., Hickerson, R., Noller, H.F. and Clegg, R.M. (2005) Measurements of internal distance  
27 changes of the 30S ribosome using FRET with multiple donor-acceptor pairs: quantitative  
28 spectroscopic methods. *J. Mol. Biol.* , **351**, 1123-1145.
- 29 13. Hickerson, R., Majumdar, Z.K., Baucom, A., Clegg, R.M. and Noller, H.F. (2005) Measurement of  
30 internal movements within the 30 S ribosomal subunit using Förster resonance energy transfer.  
31 *Journal of molecular biology*, **354**, 459-472.
- 32 14. Ermolenko, D.N., Majumdar, Z.K., Hickerson, R.P., Spiegel, P.C., Clegg, R.M. and Noller, H.F. (2007)  
33 Observation of intersubunit movement of the ribosome in solution using FRET. *J. Mol. Biol.* , **370**,  
34 530-540.
- 35 15. Li, X., Mooney, P., Zheng, S., Booth, C.R., Braunfeld, M.B., Gubbens, S., Agard, D.A. and Cheng, Y. (2013)  
36 Electron counting and beam-induced motion correction enable near-atomic-resolution single-particle  
37 cryo-EM. *Nat. Methods* **10**, 584-590.
- 38 16. Shaikh, T.R., Gao, H., Baxter, W.T., Asturias, F.J., Boisset, N., Leith, A. and Frank, J. (2008) SPIDER image  
39 processing for single-particle reconstruction of biological macromolecules from electron micrographs.  
40 *Nat. Protoc.* , **3**, 1941-1974.
- 41 17. Rath, B.K. and Frank, J. (2004) Fast automatic particle picking from cryo-electron micrographs using a  
42 locally normalized cross-correlation function: a case study. *J. Struct. Biol.* , **145**, 84-90.
- 43 18. Mindell, J.A. and Grigorieff, N. (2003) Accurate determination of local defocus and specimen tilt in  
44 electron microscopy. *J. Struct. Biol.* , **142**, 334-347.

- 1 19. Scheres, S.H. (2012) A Bayesian view on cryo-EM structure determination. *J. Mol. Biol.* , **415**, 406-418.
- 2 20. Pettersen, E.F., Goddard, T.D., Huang, C.C., Couch, G.S., Greenblatt, D.M., Meng, E.C. and Ferrin, T.E.
- 3 (2004) UCSF Chimera--a visualization system for exploratory research and analysis. *J. Comput. Chem.* ,
- 4 **25**, 1605-1612.

5
